# Supplementary material for: Prevalence of passive smoking in the community population aged 15 years and older in China: a systematic review and meta-analysis
Source: PubMed Central journal article supplement — BMJ Open. 2016 Apr 8;6(4):e009847. doi: 10.1136/bmjopen-2015-009847 (PMC4838695; doi:10.1136/bmjopen-2015-009847), 2016-04-08
Supplement: bmjopen-2015-009847supp.pdf [file bmjopen-2015-009847supp.pdf]

## 1. Search Strategy

Source: PubMed

Searched on: January 29th, 2015

#1 ("Tobacco Smoke Pollution"[Mesh]) OR passive smoking [Title/Abstract])  
OR second hand smoke [Title/Abstract]

#2 (((("Cross-Sectional Studies"[Mesh]) OR descriptive study [Title/Abstract])  
OR epidemiology [Title/Abstract]) OR survey [Title/Abstract])

#3 (((((China [Affiliation]) OR Macau [Affiliation]) OR Hong Kong [Affiliation]))  
OR Taiwan [Affiliation])

#4 #1 AND #2 AND #3

Source: CBM (the Chinese Biological Medical Literature database)

Searched on: January 29th, 2015

主题词检索(Mesh search)

("烟草烟污染"[不加权:扩展]) AND "横断面研究"[不加权:扩展]

= "Tobacco Smoke Pollution" [Mesh] AND "Cross-Sectional Studies"[Mesh]

关键词检索(Keyword search)

#1 被动吸烟 AND 横断面

#2 被动吸烟 AND 现况

#3 环境烟草 AND 横断面

#4 环境烟草 AND 现况

#5 #1 OR #2 OR #3 OR #4

The search strategy in other database just did some adjustments on the basis of the above database.

## **2. Methodological scoring system used to rate studies included**

| Item                                                | Score    |
|-----------------------------------------------------|----------|
| 1. Random sample or whole population                | 1 point  |
| 2. Unbiased sampling frame (i.e. census data)       | 1 point  |
| 3. Adequate sample size (>300 subjects)             | 1 point  |
| 4. Measures were the standard                       | 1 point  |
| 5. Outcomes measured by unbiased assessors          | 1 point  |
| 6. Adequate response rate (70%), refusers described | 1 point  |
| 7. Confidence intervals, subgroup analysis          | 1 point  |
| 8. Study subjects described                         | 1 point  |
| Maximum score                                       | 8 points |

Table S1 Methodological quality assessment results for included studies

| Study                               | item 1 | item 2 | item 3 | item 4 | item 5 | item 6 | item 7 | item 8 | Total* | Quality Category# |
|-------------------------------------|--------|--------|--------|--------|--------|--------|--------|--------|--------|-------------------|
| Yang et al. (2015) <sup>15</sup>    | 1      | 0      | 1      | 1      | 1      | 0      | 1      | 1      | 6      | Moderate          |
| Chinese CDC (2014) <sup>44</sup>    | 1      | 1      | 1      | 1      | 1      | 1      | 0      | 1      | 7      | Good              |
| Cai, L. et al. (2014) <sup>34</sup> | 1      | 0      | 1      | 1      | 1      | 0      | 1      | 1      | 6      | Moderate          |
| Chen et al.(a) (2014) <sup>33</sup> | 1      | 0      | 1      | 1      | 1      | 1      | 0      | 1      | 6      | Moderate          |
| Chen et al.(b) (2014) <sup>69</sup> | 1      | 0      | 1      | 1      | 1      | 1      | 0      | 1      | 6      | Moderate          |
| Li et al.(a) (2014) <sup>32</sup>   | 1      | 0      | 1      | 1      | 1      | 0      | 0      | 1      | 5      | Moderate          |
| Li et al.(b) (2014) <sup>31</sup>   | 1      | 0      | 1      | 1      | 1      | 0      | 0      | 1      | 5      | Moderate          |
| Qi et al. (2014) <sup>30</sup>      | 1      | 0      | 1      | 1      | 1      | 0      | 0      | 1      | 5      | Moderate          |
| Wang et al. (2014) <sup>59</sup>    | 1      | 0      | 1      | 1      | 1      | 0      | 1      | 1      | 6      | Moderate          |
| Yan et al. (2014) <sup>58</sup>     | 1      | 0      | 1      | 1      | 1      | 0      | 0      | 1      | 5      | Moderate          |
| Li, S.J et al. (2013) <sup>55</sup> | 1      | 0      | 1      | 1      | 1      | 0      | 1      | 1      | 6      | Moderate          |
| Fan et al. (2013) <sup>70</sup>     | 1      | 0      | 1      | 1      | 1      | 0      | 0      | 1      | 5      | Moderate          |
| Li et al. (2013) <sup>46</sup>      | 1      | 0      | 0      | 1      | 1      | 0      | 0      | 1      | 4      | Moderate          |
| Liu et al. (2013) <sup>35</sup>     | 1      | 0      | 1      | 1      | 1      | 0      | 0      | 1      | 5      | Moderate          |
| Wu et al. (2013) <sup>71</sup>      | 1      | 0      | 1      | 1      | 1      | 1      | 0      | 1      | 6      | Moderate          |
| Zhang et al. (2013) <sup>36</sup>   | 1      | 0      | 1      | 1      | 1      | 1      | 0      | 1      | 6      | Moderate          |
| Cai, L. et al. (2012) <sup>38</sup> | 1      | 0      | 1      | 1      | 1      | 0      | 1      | 1      | 6      | Moderate          |
| Feng et al. (2012) <sup>53</sup>    | 1      | 0      | 1      | 1      | 1      | 0      | 0      | 1      | 5      | Moderate          |
| Han et al. (2012) <sup>57</sup>     | 1      | 0      | 1      | 1      | 1      | 0      | 0      | 1      | 5      | Moderate          |
| Huang et al. (2012) <sup>52</sup>   | 1      | 0      | 1      | 1      | 1      | 0      | 0      | 1      | 5      | Moderate          |
| Li et al. (2012) <sup>48</sup>      | 1      | 0      | 0      | 1      | 0      | 0      | 0      | 1      | 3      | Poor              |
| Sun et al. (2012) <sup>51</sup>     | 1      | 0      | 1      | 1      | 1      | 0      | 0      | 1      | 5      | Moderate          |
| Wang et al.(a) (2012) <sup>72</sup> | 1      | 0      | 1      | 1      | 1      | 0      | 0      | 1      | 5      | Moderate          |

|                                     |   |   |   |   |   |   |   |   |   |          |
|-------------------------------------|---|---|---|---|---|---|---|---|---|----------|
| Wang et al.(b) (2012) <sup>56</sup> | 1 | 0 | 1 | 1 | 1 | 1 | 0 | 1 | 6 | Moderate |
| Wei et al. (2012) <sup>47</sup>     | 1 | 0 | 1 | 1 | 1 | 0 | 0 | 1 | 5 | Moderate |
| Xu et al. (2012) <sup>37</sup>      | 1 | 0 | 1 | 1 | 1 | 0 | 0 | 1 | 5 | Moderate |
| Feng et al. (2011) <sup>63</sup>    | 1 | 0 | 1 | 1 | 1 | 0 | 0 | 1 | 5 | Moderate |
| Meng et al. (2011) <sup>60</sup>    | 1 | 0 | 1 | 1 | 1 | 0 | 0 | 1 | 5 | Moderate |
| Chinese CDC (2010) <sup>18</sup>    | 1 | 1 | 1 | 1 | 1 | 1 | 0 | 1 | 7 | Good     |
| GATS China (2010) <sup>6</sup>      | 1 | 1 | 1 | 1 | 1 | 1 | 1 | 1 | 8 | Good     |
| Chinese CDC (2009) <sup>39</sup>    | 1 | 1 | 1 | 1 | 1 | 1 | 0 | 1 | 7 | Good     |
| Chen et al. (2009) <sup>73</sup>    | 1 | 0 | 1 | 1 | 1 | 0 | 0 | 1 | 5 | Moderate |
| Zhou et al. (2009) <sup>16</sup>    | 1 | 0 | 1 | 1 | 1 | 0 | 0 | 1 | 5 | Moderate |
| Wang et al. (2008) <sup>17</sup>    | 1 | 0 | 1 | 1 | 1 | 1 | 0 | 1 | 6 | Moderate |
| Jiang et al. (2007) <sup>49</sup>   | 1 | 0 | 1 | 1 | 0 | 0 | 0 | 1 | 4 | Moderate |
| Su et al. (2007) <sup>54</sup>      | 1 | 0 | 1 | 1 | 1 | 1 | 0 | 1 | 6 | Moderate |
| Wang et al. (2007) <sup>61</sup>    | 1 | 0 | 1 | 1 | 1 | 0 | 0 | 1 | 5 | Moderate |
| Han et al. (2006) <sup>41</sup>     | 1 | 0 | 1 | 1 | 1 | 0 | 0 | 1 | 5 | Moderate |
| Huang et al. (2006) <sup>50</sup>   | 1 | 0 | 1 | 1 | 1 | 0 | 0 | 1 | 5 | Moderate |
| Ying et al. (2006) <sup>40</sup>    | 1 | 0 | 1 | 1 | 0 | 0 | 0 | 1 | 4 | Moderate |
| Zhang et al. (2006) <sup>62</sup>   | 1 | 0 | 1 | 1 | 0 | 0 | 0 | 1 | 4 | Moderate |
| Ma et al. (2006) <sup>45</sup>      | 1 | 1 | 1 | 1 | 1 | 1 | 0 | 1 | 7 | Good     |
| Yang et al. (2005) <sup>42</sup>    | 1 | 1 | 1 | 1 | 1 | 1 | 0 | 1 | 7 | Good     |
| Yao et al. (2002) <sup>43</sup>     | 1 | 0 | 1 | 1 | 1 | 0 | 0 | 1 | 5 | Moderate |
| Wen et al. (1999) <sup>74</sup>     | 1 | 0 | 1 | 1 | 1 | 0 | 0 | 1 | 5 | Moderate |
| Lin et al. (1997) <sup>75</sup>     | 1 | 0 | 1 | 1 | 0 | 0 | 1 | 1 | 5 | Moderate |

\*Each item is scored 0 (no/unclear) or 1 (yes) to yield a total score ranging from 0-8.

#Quality category, total quality score was classified as either 'poor' (total score=0-3), 'moderate' (total score=4-6), or 'good' (total score=7-8).

**Table S2** Trends in the pooled prevalence of passive smoking by sex, area and age in the community population aged 15 and above in China: 1995-2013

| Survey year                 | 1995-1999       | 2002-2004       | 2005-2007       | 2008-2010       | 2011-2013       |
|-----------------------------|-----------------|-----------------|-----------------|-----------------|-----------------|
| <b>Prevalence% (95%CI)</b>  |                 |                 |                 |                 |                 |
| overall                     | 43.4(30.2-56.5) | 50.9(42.2-59.6) | 51.6(35.6-67.6) | 47.3(41.7-52.9) | 50.4(44.7-56.2) |
| male                        | 31.3(15.9-46.8) | 39.0(30.6-47.4) | 43.3(28.0-58.6) | 48.4(38.5-58.3) | 42.4(35.7-48.8) |
| female                      | 36.8(26.2-47.4) | 52.8(43.1-62.6) | 36.2(32.1-40.3) | 49.2(41.9-56.5) | 48.1(42.8-53.5) |
| urban                       | 28.7(27.2-30.2) | 53.6(39.5-67.6) | 40.1(35.5-44.6) | 51.3(39.3-63.2) | 46.5(31.9-61.0) |
| rural                       | ..              | 40.1(31.4-48.8) | 33.0(18.9-47.1) | 47.1(33.1-61.0) | 42.8(37.1-48.5) |
| 15-59                       | 29.4(27.9-31.0) | 48.5(40.0-57.0) | 44.9(36.6-53.1) | 49.0(40.7-57.3) | 46.2(38.7-53.6) |
| ≥60                         | 26.5(21.2-31.8) | 34.1(28.1-40.1) | 29.7(28.4-31.0) | 38.6(31.8-45.4) | 32.8(24.9-40.7) |
| <b>No. studies (sample)</b> |                 |                 |                 |                 |                 |
| overall                     | 3(9065)         | 9(190324)       | 5(32005)        | 19(115141)      | 9(34147)        |
| male                        | 2(2437)         | 7(52785)        | 4(12044)        | 17(17489)       | 8(9565)         |
| female                      | 2(6030)         | 9(137539)       | 4(31810)        | 19(70688)       | 8(24446)        |
| urban                       | 1(3633)         | 6(63112)        | 3(18254)        | 8(33043)        | 3(5327)         |
| rural                       | ..              | 6(116797)       | 2(23063)        | 6(28035)        | 4(14126)        |
| 15-59                       | 1(3369)         | 6(135921)       | 2(32291)        | 9(47754)        | 4(23521)        |
| ≥60                         | 1(264)          | 6(27147)        | 2(4931)         | 11(25429)       | 4(2799)         |

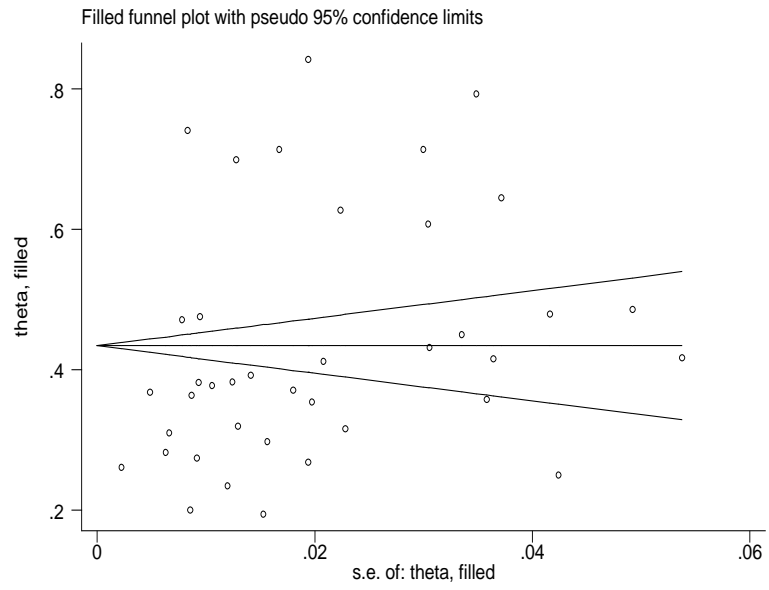

**Figure S1** 'Trim and fill' method
